# Supplementary material for: Light-Sheet Laser Speckle Imaging
Source: Research Square preprint supplement (doi:10.21203/rs.3.rs-2202454/v1), 2022-10-31
Supplement: Supplementary file 1 [file f74dcb80d5b33591c5b9d4cc.docx]

Supplementary information

**Light-Sheet Laser Speckle Imaging**

Kai Long1, Keertana Vinod Ram1, Shuhao Shen2, E Du3, Ziheng Ren4, Zhiyuan Gong4,and Nanguang Chen1, 5, *

*1**Department of Biomedical Engineering, National University of Singapore, 4 Engineering Drive 3, S117583, Singapore*

*2Xidian University, Guangzhou Institute of Technology, Guangzhou 510555, China*

*3**School of Microelectronics, Shenzhen Institute of Information Technology, Shenzhen 518172, China*

*4* *Department of Biological Sciences, National University of Singapore, 16 Science Drive 4, S117558, Singapore*

*5* *NUS (Suzhou) Research Institute, No. 377 Linquan Street, Suzhou Industrial Park, Suzhou, Jiangsu, China*

Corresponding author

*Correspondence to: Nanguang Chen，[*biecng@nus.edu.sg*](mailto:biecng@nus.edu.sg)

**List of supplementary information**

**NOTE S1. Laser speckle signal characteristics (Page 2)**

**NOTE S1. Laser speckle signal characteristics**

Here we provide additional analysis of raw laser speckle signals obtained from the trunk region of a 3-dpf zebrafish larva (**Fig. 3c**). Shown in **Fig. S1a** is a representative temporal speckle signal picked from one pixel in the artery (DA). Its autocorrelation function and frequency domain power spectrum are plotted in **Fig. S1b** and **Fig. S1c**, respectively. In a smaller delay time window (**Fig. S1d**), two different exponential decay patterns are visible in the experimental data (blue dots) and the curve can be best fitted to

. (1)

Here the first exponential term (green dashed) corresponds to single scattering unordered motion () with a relatively long decorrelation time of 20.5 milliseconds. It is associated with the slow background random motion of blood cells as well as the entire animal at an effective velocity of 39.7 . The second exponential term (light blue) is linked to single scattering ordered motion () with a much smaller decorrelation time of 3.66 milliseconds, translating to a flow velocity of 223 .

An example speckle signal from the vein (PCV) is plotted in **Fig. S1e**, which is identical to that in **Fig. 3c2**. One can see in its power spectrum (**Fig. S1e**) a strong side lobe, which is concentrated in a small frequency range and appears as a sharp peak. In comparison, the side lobe in the DA signal power spectrum (**Fig. S1c**) is much weaker and broadly distributed. Consequently, the DA autocorrelation function contains negligible fast ripples while a strong, periodic modulating pattern can be seen in the PCV , which may lead to additional challenges in model fitting.

**Figure S1| DA and PCV laser speckle signal characteristics.** (**a**) Raw laser speckle signal from a pixel in the DA, (**b**) its autocorrelation function, and (**c**) frequency domain power spectrum. (**d**) Fitting of the DA autocorrelation function (blue dots) with the sum (red) of one background motion term (green dashed) and one flow velocity term (light blue). (**e**) Raw laser speckle signal from a pixel in the PCV and (**f**) its frequency domain power spectrum.
